RESEARCH PAPER

# Melatonin mediates the regulation of ABA metabolism, free-radical scavenging, and stomatal behaviour in two *Malus* species under drought stress

Chao Li<sup>1</sup>, Dun-Xian Tan<sup>2</sup>, Dong Liang<sup>1</sup>, Cong Chang<sup>1</sup>, Dongfeng Jia<sup>1</sup> and Fengwang Ma<sup>1,\*</sup>

<sup>1</sup> State Key Laboratory of Crop Stress Biology for Arid Areas, College of Horticulture, Northwest A and F University, Yangling, Shaanxi 712100, China

<sup>2</sup> Department of Cellular and Structural Biology, The University of Texas, Health Science Center at San Antonio, 7703 Floyd Curl, San Antonio, TX 78229, USA

\* To whom correspondence should be addressed. E-mail: [fwm64@nwsuaf.edu.cn](mailto:fwm64@nwsuaf.edu.cn); [fwm64@sina.com](mailto:fwm64@sina.com)

Received 7 June 2014; Revised 17 September 2014; Accepted 24 October 2014

## Abstract

Melatonin pre-treatment significantly increases the tolerance of both drought-tolerant *Malus prunifolia* and drought-sensitive *M. hupehensis* plants. Its beneficial effects include better water conservation in leaves, less electrolyte leakage, steady chlorophyll contents, and greater photosynthetic performance under stress conditions. Melatonin selectively down-regulates *MdNCED3*, an abscisic acid (ABA) synthesis gene, and up-regulates its catabolic genes, *MdCYP707A1* and *MdCYP707A2*, thereby reducing ABA contents in drought-stressed plants. Melatonin also directly scavenges H<sub>2</sub>O<sub>2</sub> and enhances the activities of antioxidant enzymes to detoxify H<sub>2</sub>O<sub>2</sub> indirectly. These two mechanisms work synergistically to improve the functions of stomata, i.e. causing them to re-open. Plants can effectively regulate their water balance under drought conditions by up-regulating the expression of melatonin synthesis genes *MdTDC1*, *MdAANAT2*, *MdT5H4*, and *MdASMT1*. Therefore, inducing melatonin production is an important mechanism by which plants can counteract the influence of this abiotic stressor.

**Key words:** ABA, drought, abiotic stress, H<sub>2</sub>O<sub>2</sub>, *Malus*, melatonin, stomata, antioxidant.

## Introduction

Drought stress presents one of the major limitations to crop productivity because it negatively alters plant physiology. The cellular changes that are associated with this stressor include turgor loss, changes in membrane fluidity and composition, and disturbances to protein–protein and protein–lipid interactions (Chaves *et al.*, 2003). Drought also increases the generation of reactive oxygen species (ROS) (Ippolito *et al.*, 2011), which induce membrane lipid peroxidation, ultimately leading to membrane dysfunction (Li *et al.*, 2011). Under

a water deficit, plants activate a diverse set of physiological, metabolic, and defence systems to survive and sustain growth, such as reducing water losses by increasing diffusive resistance, improving water uptake through prolific and deep root systems, and developing smaller and more succulent leaves to minimize transpiration. Low-molecular-weight osmolytes, including glycine betaine, proline and other amino acids, organic acids, and polyols, also play vital roles in sustaining cellular functions under drought (Farooq *et al.*, 2012).

Abbreviations: AANAT, arylalkylamine *N*-acetyltransferase; ABA, abscisic acid; APX, ascorbate peroxidase; ASMT, *N*-acetylserotonin methyltransferase; Car, carotenoid; CAT, catalase; Chl, chlorophyll; CYP707A, ABA 8'-hydroxylase; g<sub>s</sub>, stomatal conductance; H<sub>2</sub>O<sub>2</sub>, hydrogen peroxide; NCED, 9-*cis*-epoxycarotenoid dioxygenase; PBS, phosphate-buffered saline; P<sub>n</sub>, net photosynthesis rate; POD, peroxidase; REL, relative electrolyte leakage; ROS, reactive oxygen species; RWC, relative water content; SEM, scanning electron microscopy; TDC, tryptophan decarboxylase; T5H, tryptamine 5-hydroxylase.

© The Author 2014. Published by Oxford University Press on behalf of the Society for Experimental Biology. All rights reserved.  
For permissions, please email: [journals.permissions@oup.com](mailto:journals.permissions@oup.com)

A water deficit can also trigger production of the phytohormone abscisic acid (ABA), which in turn causes stomata to close and induces the expression of drought stress-related genes to modulate plant responses (Seki *et al.*, 2007).

The accumulation of endogenous ABA in plant tissues is regulated by a balance between biosynthesis and catabolism (Kushiro *et al.*, 2004). The 9-*cis*-epoxycarotenoid dioxygenase (NCED) is a key enzyme in ABA biosynthesis in multicellular plants, where it cleaves the 11, 12 double bonds of a C40 carotenoid (Car) and produces xanthoxin (Qin and Zeevaart, 1999). Of the five NCED family members in *Arabidopsis*, *AtNCED3* plays a crucial role in drought-induced ABA biosynthesis (Iuchi *et al.*, 2001). Although its transcripts are rapidly induced by water stress, T-DNA insertional *nced3* mutants have defects in ABA accumulation under drought conditions and, thus, they have impaired tolerance. Abscisic acid is primarily catabolized to form 8'-hydroxy ABA through hydroxylation with ABA 8'-hydroxylase (Nambara and Marion-Poll, 2005). This hydroxylation at the 8'-position seems to be the key step in ABA catabolism, and is catalysed by CYP707A, an ABA 8'-hydroxylase belonging to a class of cytochrome P450 monooxygenases (Kushiro *et al.*, 2004; Saito *et al.*, 2004). In apple seedlings, *MdCYP707A1* and *MdCYP707A2* regulate ABA metabolism under drought conditions (Kondo *et al.*, 2012).

The accumulation of ABA in plant cells is associated with the formation of ROS (Liu *et al.*, 2010; Zhu, 2002). For example, when less endogenous ABA is available, an accumulation of hydrogen peroxide (H<sub>2</sub>O<sub>2</sub>) is accordingly reduced (Ye *et al.*, 2011). As the most important ROS, H<sub>2</sub>O<sub>2</sub> participates in a series of processes for plant development, stress responses, and programmed cell death (Apel and Hirt, 2004; Bethke and Jones, 2001; Foyer and Noctor, 2005; Pei *et al.*, 2000). Notably, H<sub>2</sub>O<sub>2</sub> is directly involved in the regulation of stomatal movement. The opening and closing of stomata represent physiological responses by plants to drought stress (Dehesh *et al.*, 2014; Schroeder *et al.*, 2001; Xia *et al.*, 2014). Thus, the relationship between ABA and H<sub>2</sub>O<sub>2</sub> plays a central role under drought stress. Although ABA activates the synthesis of H<sub>2</sub>O<sub>2</sub> in guard cells, apparently via NADPH oxidase, H<sub>2</sub>O<sub>2</sub> mediates ABA-induced stomatal closure. At micromolar concentrations, H<sub>2</sub>O<sub>2</sub> stimulates the activation of important plasma membrane Ca<sup>2+</sup> channels (Neill *et al.*, 2002). Induction of stomatal closure by H<sub>2</sub>O<sub>2</sub> has been observed in *Vicia faba* and the epidermis of tobacco (*Nicotiana tabacum*) (Zhang *et al.*, 2001). In plants, H<sub>2</sub>O<sub>2</sub> has two origins, the chloroplast and cytoplasmic/plasma membranes (Zhang *et al.*, 2001).

Melatonin (*N*-acetyl-5-methoxytryptamine) is a potent, naturally occurring antioxidant that effectively scavenges both ROS and reactive nitrogen species (RNS) in animals and plants (Tan *et al.*, 2012). It is synthesized from tryptophan sequentially by four enzymes (Arnao and Hernández-Ruiz, 2006; Kang *et al.*, 2011; Park *et al.*, 2012). Genes for the first two enzymes, tryptophan decarboxylase (TDC) and tryptamine 5-hydroxylase (T5H), have been cloned and characterized in rice (*Oryza sativa*; Kang *et al.*, 2007a, b). The third enzyme, serotonin *N*-acetyltransferase (SNAT) [also called arylalkylamine *N*-acetyltransferase (AANAT)], was

identified by Okazaki *et al.* (2009) in the unicellular green alga *Chlamydomonas reinhardtii*. Ectopic overexpression of SNAT in tomato (*Solanum lycopersicum*) results in enhanced melatonin production. *N*-acetylserotonin methyltransferase (ASMT), the last enzyme in the melatonin synthesis pathway, catalyses *N*-acetylserotonin into melatonin; it has been cloned and characterized in rice by Kang *et al.* (2011).

The benefits of melatonin have been documented in studies with various abiotic stressors, e.g. extreme temperatures (Kang *et al.*, 2010; Lei *et al.*, 2004; Shi and Chan, 2014; Xu, 2010), heavy metals (Posmyk *et al.*, 2008; Tan *et al.*, 2007a), UV radiation (Afreen *et al.*, 2006), and elevated salinity (Li *et al.*, 2012; Tal *et al.*, 2011; Zhang *et al.*, 2014). In addition to serving as an antioxidant, melatonin regulates root development (Park and Back, 2012; Pelagio-Flores *et al.*, 2012; Zhang *et al.*, 2013), seed germination (Tiryaki and Keles, 2012; Zhang *et al.*, 2013), leaf senescence (Wang *et al.*, 2013a, b; Wang *et al.*, 2014), and circadian rhythms (Arnao and Hernández-Ruiz, 2009; Kolář *et al.*, 1997). Even though this molecule positively influences plant responses to drought stress, such as by promoting seed germination and seedling growth in PEG-stressed cucumber (*Cucumis sativus* L.) (Zhang *et al.*, 2013) and retarding drought-induced leaf senescence in apple (Wang *et al.*, 2013a, b), the exact mechanisms by which these are accomplished are largely unknown.

To understand better how melatonin functions in plants exposed to drought conditions, two genotypes of apple species, the tolerant *Malus prunifolia* and the sensitive *Malus hupehensis* were studied. Whereas melatonin-deficient plants are less well-protected against abiotic stress when compared with the wild type (Okazaki *et al.*, 2010), melatonin-rich plants are better able to withstand such challenges (Park *et al.*, 2013). Therefore, it is hypothesized that the amount of endogenously produced melatonin would be significantly higher in *M. prunifolia* than in *M. hupehensis*, such that the latter would be less tolerant of drought stress. If true, then pre-treatment with melatonin would be more beneficial if applied to the sensitive species because its melatonin content would rise more markedly than in the tolerant species. Two approaches were taken to test the hypothesis. First, a short-term water stress by withholding irrigation to selected plants of both species was induced. Second, the expression of genes involved in either the ABA metabolic pathway or the regulation of enzymes for melatonin production, as well as activities by antioxidant enzymes and stomatal behaviour were monitored. The objective was to increase our knowledge about the mechanisms by which melatonin can increase plant tolerance to ensuing drought conditions.

## Materials and methods

### Plant material

All experiments were performed in a greenhouse at the Northwest A and F University, Yangling (34°20'N, 108°24'E), China. Seeds of *M. prunifolia* and *M. hupehensis* were collected from Fuping, Shaanxi (34°75'N, 109°15'E) and Pingyi, Shandong (35°07'N, 117°25'E), respectively. Two-year-old plants were grown in plastic pots (30 cm×26 cm×22 cm) filled with a 5:1:1 (v:v:v) mixture of forest soil:sand:organic substrate. The plants were watered once a week

with half-strength Hoagland nutrient solution before the experiments. Standard horticultural practices were followed for disease and pest control.

#### Experimental designs

At the initiation of the study (July 2013), the stems, measured without branches, were approximately 1.0 m tall. Half of the plants for each species were treated with a half-strength nutrient solution containing 100  $\mu\text{M}$  melatonin for 10 d. After this pre-cultivation period, the groups of control (CK) and melatonin-pre-treated plants (MT) were each randomly re-divided into two subgroups: normally watered controls and drought-stressed plants. For the latter, water was withheld for 6 d. This resulted in four study groups: (1) normally watered control (Control); (2) drought-stressed plants (Drought); (3) plants with melatonin (100  $\mu\text{M}$ ) pre-treated for 10 d, followed by normal irrigation (MC); and (4) plants receiving melatonin (100  $\mu\text{M}$ ) pre-treatment for 10 d but then exposed to drought stress (MD). Each group contained 40 plants. The fifth to eighth leaves from the top of a stem (fully mature leaves) were sampled from five trees per treatment group each day between 09.00 and 11.00 h. The collected leaves were rapidly frozen in liquid nitrogen and stored at  $-80^\circ\text{C}$ .

#### Relative water content and relative electrolyte leakage

During the drought period, the relative water content was computed according to the method described by Gaxiola *et al.* (2001). Leaves of each species were excised from each treatment group and their fresh weights were recorded immediately. After the leaves were floated in deionized water at  $4^\circ\text{C}$  overnight, their rehydrated weights were determined. Finally, they were oven-dried at  $70^\circ\text{C}$  for 48 h and weighed again. Relative water content was calculated as  $\text{RWC} = (\text{fresh weight} - \text{dry weight}) / (\text{rehydrated weight} - \text{dry weight})$ . Relative electrolyte leakage (REL) was determined from the leaves according to the method described by Dionisio-Sese and Tobita (1998).

#### RT-PCR analysis

Total RNA was extracted from leaves per the method described by Chang *et al.* (1993). Sequences for primers of *MdTDC1*, *MdT5H4*, *MdAANAT2*, and *MdASMT1* were obtained according to Lei *et al.* (2013). Sequences for primers of *MdCYP707A1* and *MdCYP707A2* were determined according to Kondo *et al.* (2012). Sequences for primers of *MdNCED3* and *EF-1a* were designed by Primer Premier 6 software (Biosoft International, Palo Alto, CA, USA). All primers are listed in Table 1. Poly(A)<sup>+</sup> RNA was purified with a poly(A)<sup>+</sup> Ttract<sup>®</sup> mRNA Isolation Systems III kit (Promega, USA) according to the manufacturer's instructions. Real-time PCR was performed on an iQ5.0 instrument (Bio-Rad, USA) using SYBR Green qPCR kits (TaKaRa) according to the manufacturer's instructions. To test the suitability of these primers, the specificity and identity of the reverse transcription (RT)-PCR products were monitored after each reaction by conducting melting-curve analysis of the products.

Transcripts of the *Malus* elongation factor 1 alpha gene (*EF-1a*; DQ341381) were used to standardize the cDNA samples for different genes. We had previously compared apple *EF-1a*, *actin*, and 18S rRNA as internal controls (Wang *et al.*, 2012) and found that *EF-1a* is more stable than the others as a reference gene under saline conditions. Three independent biological replications were performed for each experiment.

#### Quantification of net photosynthesis rate ( $P_n$ ) and stomatal conductance ( $g_s$ )

The net photosynthesis rate ( $P_n$ ) and stomatal conductance ( $g_s$ ) were recorded between 09.00–11.00 h, with a portable system (Li-6400; LICOR, Lincoln, NE, USA). All measurements were performed at 1000  $\mu\text{mol photons m}^{-2} \text{s}^{-1}$  and a constant airflow rate of 500  $\mu\text{mol s}^{-1}$ . The cuvette  $\text{CO}_2$  concentration was set at 400  $\mu\text{mol CO}_2 \text{mol}^{-1}$  air, with a vapour pressure deficit of 2.0–3.4 kPa. The leaf temperature

**Table 1.** Primers used for quantitative real-time RT-PCR

| Gene              | Primer sequence (5'–3')                                  |
|-------------------|----------------------------------------------------------|
| <i>MdTDC1</i>     | F:TCACGCTGTGGTTGGAGGT<br>R:CTGCATGCTCCTGAACCAAC          |
| <i>MdT5H4</i>     | F:TCGGTGACATGTTTGCTGC<br>R:GGAAACCTTGGTCTGGCG            |
| <i>MdAANAT2</i>   | F:GAATCACCGTCCACGCTCC<br>R:GAAATGCTTCCGATGTCCC           |
| <i>MdASMT1</i>    | F:AGAGGAGCGAGAAAGACTGGA<br>R:CTAAAGAAAAAACCCTCAATGAGGGAT |
| <i>MdNCED3</i>    | F:GCAGGAGATGATCGGGCG<br>R:CAGAAGCAGTCGGGGCAGT            |
| <i>MdCYP707A1</i> | F:GAAGAGGTATGCTTTTGATGTGG<br>R:TCAACAAGCCACCCTATCTTCT    |
| <i>MdCYP707A2</i> | F:ACACTTTGCAAGAGATGAAGAGG<br>R:TGTGAAAGGAAGTTCCAGGTAGA   |
| <i>EF-1a</i>      | F:ATTCAAGTATGCCTGGGTGC<br>R:CAGTCAGCCTGTGATGTTCC         |

and ambient humidity were maintained at  $30^\circ\text{C}$  and 65%, respectively. For each group, fully expanded and fully exposed leaves were sampled at the same position on each of five plants.

#### Determination of photosynthetic pigments

After the leaves were harvested on each sampling date, their photosynthetic pigments were extracted with 80% acetone. Contents were determined spectrophotometrically according to the method of Arnon (1949).

#### Observations of leaf stomata by scanning electron microscopy (SEM)

Four leaves were collected per treatment group for each species (fifth position from the top on each plant). The samples were immediately fixed with a 4% glutaraldehyde solution in 0.1 M phosphate-buffered saline (PBS; pH 6.8) to avoid any alterations during sample preparation. After being rinsed five times with PBS (for 5, 10, 15, 20, and 30 min), they were dehydrated in a graded ethanol series, vacuum-dried, and gold-coated. SEM was performed on a JSM-6360LV microscope (JEOL Ltd., Tokyo, Japan). Stomata were counted at random in 20 visual sections on the abaxial epidermis, and final tallies were used to compute their densities. Lengths, widths, and apertures were measured randomly from 20 stomata on the same specimens, using Image J software.

#### Determination of ABA content

Levels of ABA were measured as described by Zhang *et al.* (2008). Briefly, 30  $\mu\text{l}$  of purified leaf extract was injected with an autosampler (Waters 2707; Milford, MA, USA) into a high-performance liquid chromatograph (HPLC). Analytic conditions were as follows: reverse phase column (Inertsil ODS-3, 250  $\times$  4.6 mm, 5  $\mu\text{m}$ );  $30^\circ\text{C}$ ; mobile phase, methanol with 0.6% acetic acid (dissolved in re-distilled water) (45:55, v:v); and flow rate, 0.8  $\text{ml min}^{-1}$ . Phytohormone levels were determined by recording absorbance at 254 nm with a dual  $\lambda$  absorbance detector (Waters 2487). Data were acquired with an Empower chromatography workstation (Waters) and endogenous ABA was identified by comparing its retention time with that of ABA external standards (Sigma, St. Louis, MO, USA).

#### $\text{H}_2\text{O}_2$ content and activities of $\text{H}_2\text{O}_2$ -scavenging enzymes

$\text{H}_2\text{O}_2$  was extracted with 5% (w/v) trichloroacetic acid and measured as described by Patterson *et al.* (1984).

For H<sub>2</sub>O<sub>2</sub>-scavenging enzymes, leaf samples (0.1 g) were ground in a chilled mortar with 1% (w/v) polyvinylpyrrolidone, then homogenized with 1.2 ml of 50 mM potassium phosphate buffer (pH 7.8) containing 1 mM EDTA-Na<sub>2</sub> and 0.3% Triton X-100. For only the assay of ascorbate peroxidase (APX), 1 mM ascorbate was added to this mixture. Each homogenate was centrifuged at 13 000 g for 20 min at 4 °C. The supernatant was used for the following assays.

Catalase (CAT) activity was determined by monitoring the decrease in absorbance at 240 nm due to the decomposition of H<sub>2</sub>O<sub>2</sub> (extinction coefficient of 39.4 mM<sup>-1</sup> cm<sup>-1</sup>) (Chance and Maehly, 1955). Peroxidase (POD) was assayed at 470 nm (extinction coefficient 25.2 mM<sup>-1</sup> cm<sup>-1</sup>) by using H<sub>2</sub>O<sub>2</sub> and guaiacol as the reaction substrates (Chance and Maehly, 1955). APX activity was monitored as the decrease in absorbance at 290 nm when reduced ascorbate was oxidized (extinction coefficient of 2.8 mM<sup>-1</sup> cm<sup>-1</sup>) (Nakano and Asada, 1981).

#### Statistical analysis

Data were expressed as means ± standard deviation (SD). The data were analysed via one-way ANOVA, followed by Tukey's tests. A *p*-value of <0.05 indicated a significant difference.

## Results

### Melatonin pre-treatment enables *Malus* plants to maintain water status and cell membrane stability under drought stress

The RWC values for each *Malus* species were significantly reduced under drought stress. However, prior application of

100 μM melatonin to the roots through the irrigation solution substantially alleviated this response over the stress period (Fig. 1). Similarly, REL was significantly increased in both species under drought conditions, with values being lower in the tolerant *M. prunifolia* than in the sensitive *M. hupehensis* (Fig. 2). The REL was also reduced significantly in melatonin-pre-treated plants compared with non-treated plants under the water deficit. It seemed that the beneficial effects of melatonin were more profound for the sensitive species than for the tolerant species, as indicated by the declines in REL, i.e. down by 21.47% (tolerant) vs 42.08% (sensitive) (Fig. 2).

### Relative expression of melatonin synthesis genes

The melatonin synthesis genes *MdTDC1* (Fig. 3A, B), *MdT5H4* (Fig. 3C, D), *MdAANAT2* (Fig. 3E, F), and *MdASMT1* (Fig. 3G, H) were all significantly up-regulated by drought. Their relative expression levels were higher in sensitive *M. hupehensis* than in tolerant *M. prunifolia* when irrigation was withheld. Tan et al. (2012) have previously reported that melatonin synthesis is stress-inducible. Arnao and Hernández-Ruiz (2013) considered that nearly all stressful factors caused an increase in melatonin in lupin plant tissues (*Lupinus albus* L.). The chemical stress provoked by ZnSO<sub>4</sub> or NaCl caused the most pronounced changes in the endogenous level of melatonin, followed by cold and drought stressors. It was concluded that imposition of drought induced

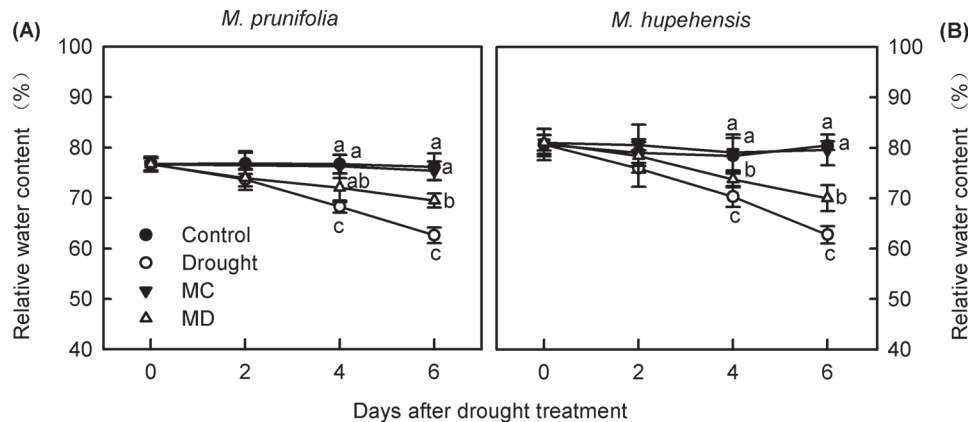

**Fig. 1.** Effects of melatonin on relative water content (RWC) for *M. prunifolia* (A) and *M. hupehensis* (B) under control and drought conditions. Closed and open circles indicate plants without melatonin pre-treatment under control and drought conditions, respectively. Closed and open triangles indicate plants with melatonin pre-treatment under control and drought conditions, respectively. Values are means of five replicates ± SD. An ANOVA test followed by Tukey's test was performed. Different letters are used to indicate means that are significantly different (*P* < 0.05).

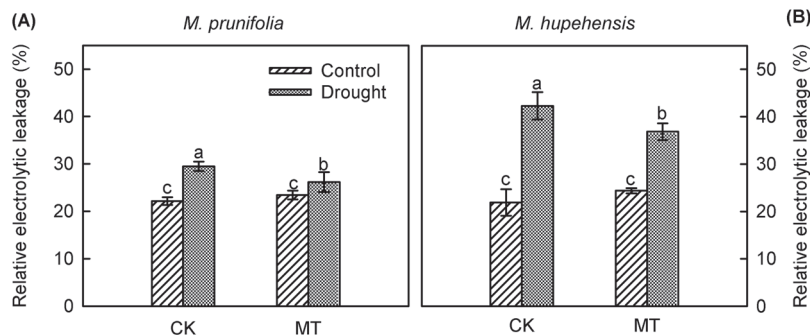

**Fig. 2.** Effects of melatonin on relative electrolyte leakage (REL) for *M. prunifolia* (A) and *M. hupehensis* (B) under control and drought conditions. CK, non-melatonin pre-treated control; MT, plants pre-treated with melatonin. Values are means of five replicates ± SD. An ANOVA test followed by Tukey's test was performed. Different letters are used to indicate means that are significantly different (*P* < 0.05).

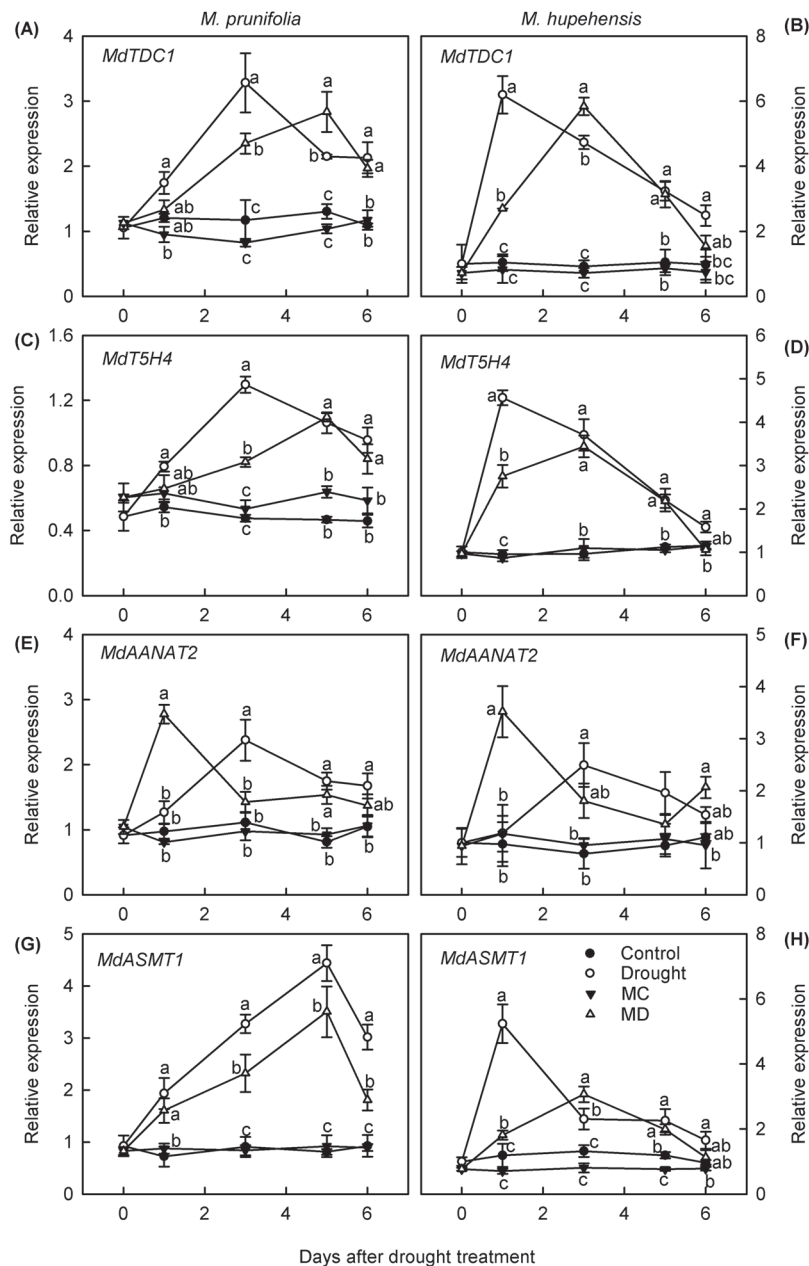

**Fig. 3.** Effects of melatonin on expression of melatonin synthesis genes: *MdTDC1* (A and B), *MdT5H4* (C and D), *MdAANAT2* (E and F), and *MdASMT1* (G and H) in leaves of *M. prunifolia* and *M. hupehensis*. Total RNA was isolated from samples at different time points, converted to cDNA, and subjected to real-time RT-PCR. Expression levels were calculated relative to expression of *Malus EF-1a* mRNA. Closed and open circles indicate plants without melatonin pre-treatment under control and drought conditions, respectively. Closed and open triangles indicate plants with melatonin pre-treatment under control and drought conditions, respectively. Values are means of five replicates  $\pm$  SD. An ANOVA test followed by Tukey's test was performed. Different letters are used to indicate means that are significantly different ( $P < 0.05$ ).

up-regulation of those genes so that additional melatonin was produced to protect against that stressor. This was even more marked in the sensitive species, where expression was even further up-regulated, thus demonstrating that those plants could not produce melatonin as efficiently as plants from the more tolerant species could. Such a phenomenon may be related to possible genetic mutations for those associated enzymes. As expected, melatonin pre-treatment suppressed the expression of synthesis genes more intensely in the tolerant species, an outcome that provided additional evidence that *M. prunifolia* already had significantly higher levels of endogenously produced melatonin when compared with *M. hupehensis*.

#### Photosynthetic response and levels of photosynthetic pigments

In response to drought stress,  $P_n$  decreased in all groups throughout the experimental period, with rates being significantly lower for non-treated than for melatonin-pre-treated plants (Fig. 4A, B). Values for  $g_s$  displayed a similar trend (Fig. 4C, D).

Under drought conditions, contents of chlorophyll *a* (Chl *a*) (Fig. 5A, B), Chl *b* (Fig. 5C, D), carotenoid (Car) (Fig. 5E, F), and total chlorophyll (Chl *t*) (Fig. 5G, H) were reduced significantly in both species when compared with unstressed

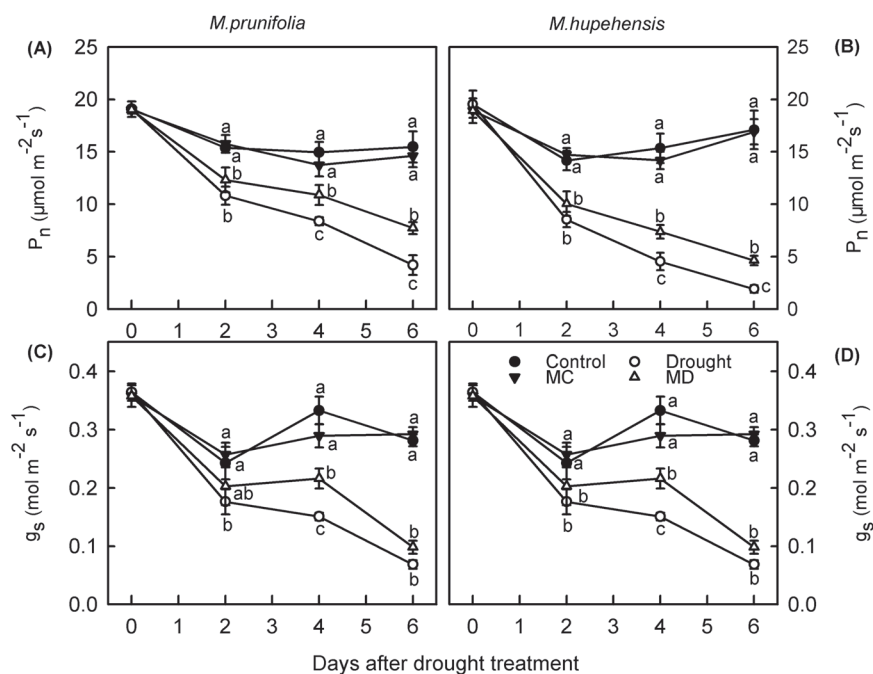

**Fig. 4.** Changes in net photosynthesis,  $P_n$  (A and B), and stomatal conductance,  $g_s$  (C and D) of *M. prunifolia* and *M. hupehensis* under control and drought conditions, with or without 100  $\mu\text{M}$  melatonin pre-treatment. Closed and open circles indicate plants without pre-treatment under control and drought conditions, respectively. Closed and open triangles indicate pre-treated plants under control and drought conditions, respectively. Values are means of five replicates  $\pm$  SD. An ANOVA test followed by Tukey's test was performed. Different letters are used to indicate means that are significantly different ( $P < 0.05$ ).

control plants. However, those pigments were largely preserved in the MD plants when compared with their melatonin-free counterparts ( $P < 0.05$ ). The protective effect of melatonin on Chl *b* and Car was greater in drought-sensitive *M. hupehensis* than in tolerant *M. prunifolia* ( $P < 0.05$ ).

#### Stomatal behaviour

The lower surfaces of the leaf samples were scanned at  $\times 3000$  magnification. The imposition of drought caused the stomata to close in both species whereas melatonin pre-treatment was associated with stomata that remained open under stress conditions (Fig. 6). Stress also resulted in stomata being significantly shorter (Fig. 7A, B) and narrower (Fig. 7C, D), as well as having smaller apertures (Fig. 7E, F) than in the control plants of either species. The MD plants also had significantly longer and wider stomata along with larger apertures (Fig. 7). In fact, when compared with those of the controls, stomatal apertures were 17.1% larger for pre-treated *M. prunifolia* and 50.6% for pre-treated *M. hupehensis* (Fig. 7E, F). Although stomatal density was not altered by drought in either species, exposure to melatonin was linked with a reduction in densities under both control and drought conditions (Fig. 7G, H).

#### ABA content and expression of genes in the ABA metabolic pathway

Melatonin did not alter ABA levels in control plants. Drought stress caused a significant elevation of ABA contents in both species whereas the melatonin pre-treatment resulted in 35.6% and 51.7% reductions in those contents in the drought-tolerant and -sensitive species, respectively (Fig. 8A, B).

Transcripts of the ABA biosynthesis gene *MdNCED3* were more abundant in leaves of both species under drought stress, but this up-regulation was significantly suppressed by melatonin pre-treatment (Fig. 9A, B). Two ABA catabolism genes, *MdCYP707A1* and *MdCYP707A2*, were also up-regulated. However, their levels of expression were significantly higher in melatonin-treated plants (Fig. 9C–F).

#### $\text{H}_2\text{O}_2$ content and activities of antioxidant enzymes

Drought stress caused a rapid increase in  $\text{H}_2\text{O}_2$  levels in leaves from all sampled plants (Fig. 10A, B). By day 1, those had risen by 29.3% and 19.0% in *M. prunifolia* and *M. hupehensis*, respectively, and they remained elevated thereafter. Melatonin pre-treatment significantly suppressed this stress-related boost in  $\text{H}_2\text{O}_2$  production. Both species showed significantly enhanced activities of CAT (Fig. 10C, D), POD (Fig. 10E, F), and APX (Fig. 10G, H) under stress, and those activities were further increased by exposure to melatonin. Levels of CAT and POD changed over time, being highest on days 1 and 3, respectively, after drought was initiated but then returning to normal levels by day 6. However, APX activity was significantly elevated throughout the 6-day experimental period. This suggested that APX was the key enzyme for detoxifying  $\text{H}_2\text{O}_2$  in drought-stressed plants.

## Discussion

Melatonin primarily functions in plants as the first line of defence against internal and environmental oxidative stressors (Tan et al., 2012). This is accomplished when melatonin

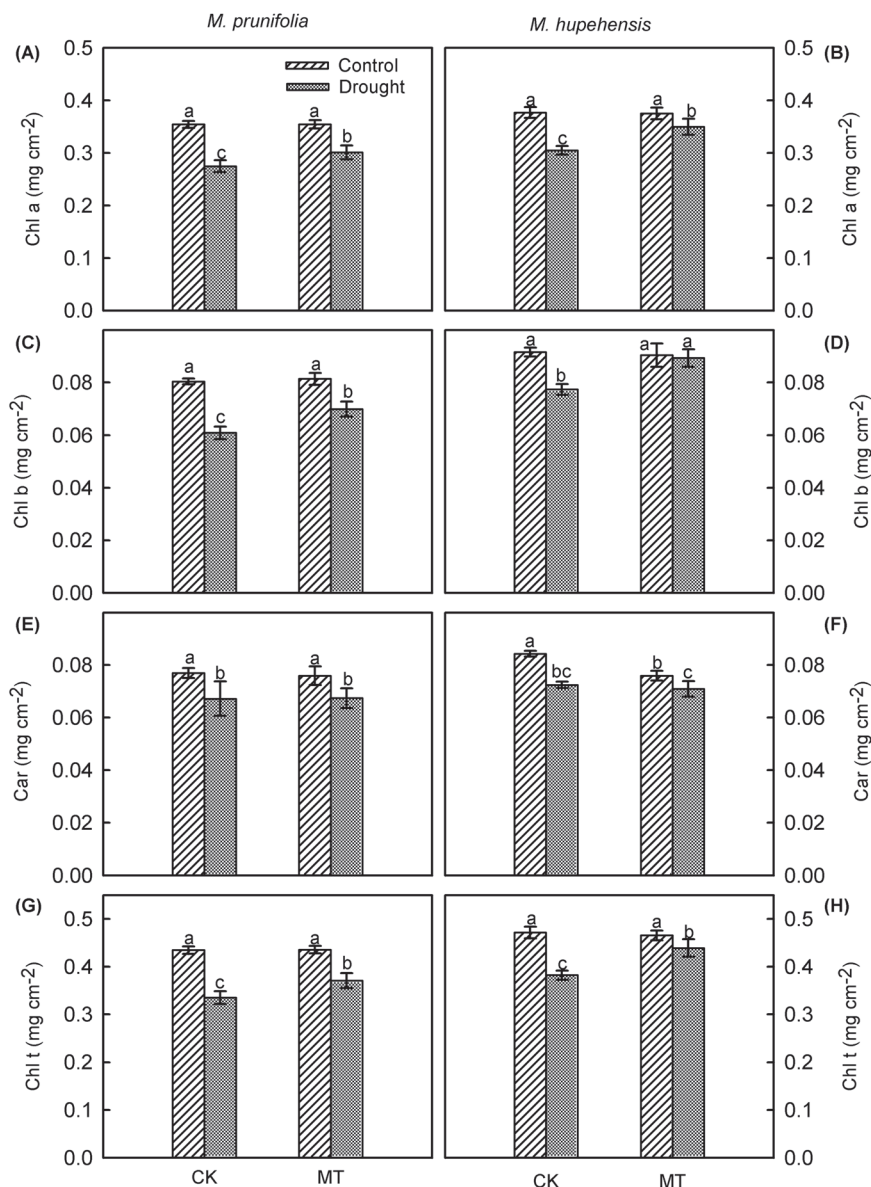

**Fig. 5.** Effects of melatonin on contents of photosynthetic pigments in *M. prunifolia* and *M. hupehensis* under control and drought conditions: Chl a (A and B), Chl b (C and D), carotenoid (Car; E and F), and total chlorophyll (Chl t; G and H). CK, non-melatonin pre-treated control; MT, plants pre-treated with melatonin. Data are means of five replicates  $\pm$  SD. An ANOVA test followed by Tukey's test was performed. Different letters are used to indicate means that are significantly different ( $P < 0.05$ ).

directly scavenges free radicals and up-regulates the expression of genes for antioxidant enzymes. As a result, this molecule is applied to plants to protect them when exposed to various stress conditions (Arnao and Hernandez-Ruiz, 2014; Lei *et al.*, 2004; Posmyk *et al.*, 2008; Shi and Chan, 2014; Tiryaki and Keles, 2012; Xu, 2010; Yin *et al.*, 2013; Zhang *et al.*, 2014), including drought (Wang *et al.*, 2013b; Zhang *et al.*, 2013). However, the exact mechanisms by which melatonin improves drought tolerance have not been fully clarified. Here, we focused on the pathway for ABA metabolism.

Abscisic acid has a key role in conferring tolerance to environmental challenges (Fujita *et al.*, 2005; Iuchi *et al.*, 2001). Under a water deficit, plants accumulate ABA, which, at high levels, can promote ROS formation and eventually lead to oxidative damage, such as leaf peroxidation, electrolyte leakage, Chl degradation, and reduced photosynthetic performance

(Jiang and Zhang, 2002; Zhu, 2002). These alterations were also observed in response to drought. Under stress conditions, expression of *MdNCED3* (for ABA biosynthesis), and *MdCYP707A1* and *MdCYP707A2* (both for ABA catabolism) was significantly up-regulated. The ABA content was also increased. Pre-treatment with melatonin selectively suppressed the up-regulation of *MdNCED3* and promoted the up-regulation of the other two, thereby reducing ABA levels when plants were later exposed to a water deficit. Therefore, this is the first report to show how melatonin buffers the effect of drought stress in plants.

Stomata have an essential role in determining drought tolerance. Their opening and closing is controlled by environmental and internal parameters, e.g. maintenance of the water balance and functioning of complex signal transduction pathways (Schroeder *et al.*, 2001). Abscisic acid mediates

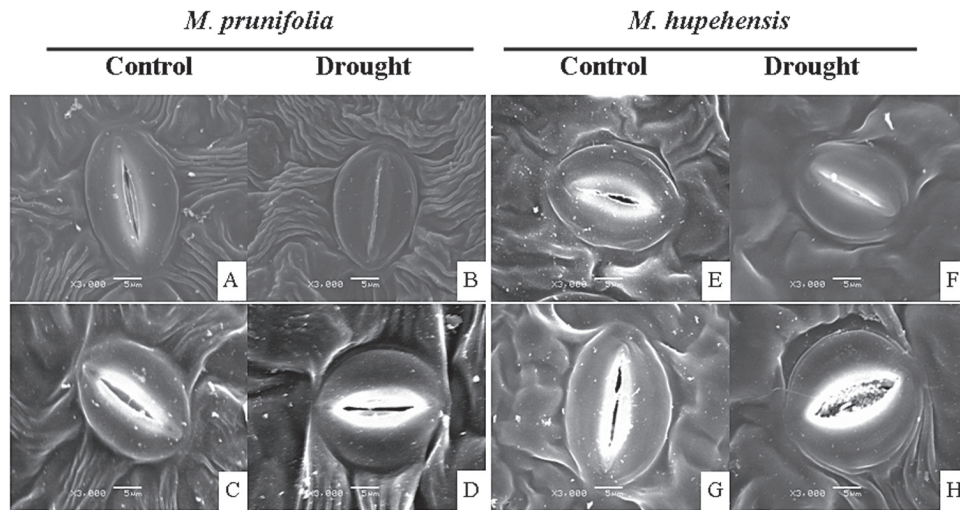

**Fig. 6.** SEM images of stomata from leaves of *M. prunifolia* and *M. hupehensis*: control leaves in which stomata are open (A and E); closed stomata in leaves exposed to drought stress for 5 d (B and F); leaves from control plants that were pre-treated with 100 μM melatonin (C and G); and leaves from drought-stressed, pre-treated plants for which all stomata are open (D and H). Magnification ×3000, scale bars=5 μm.

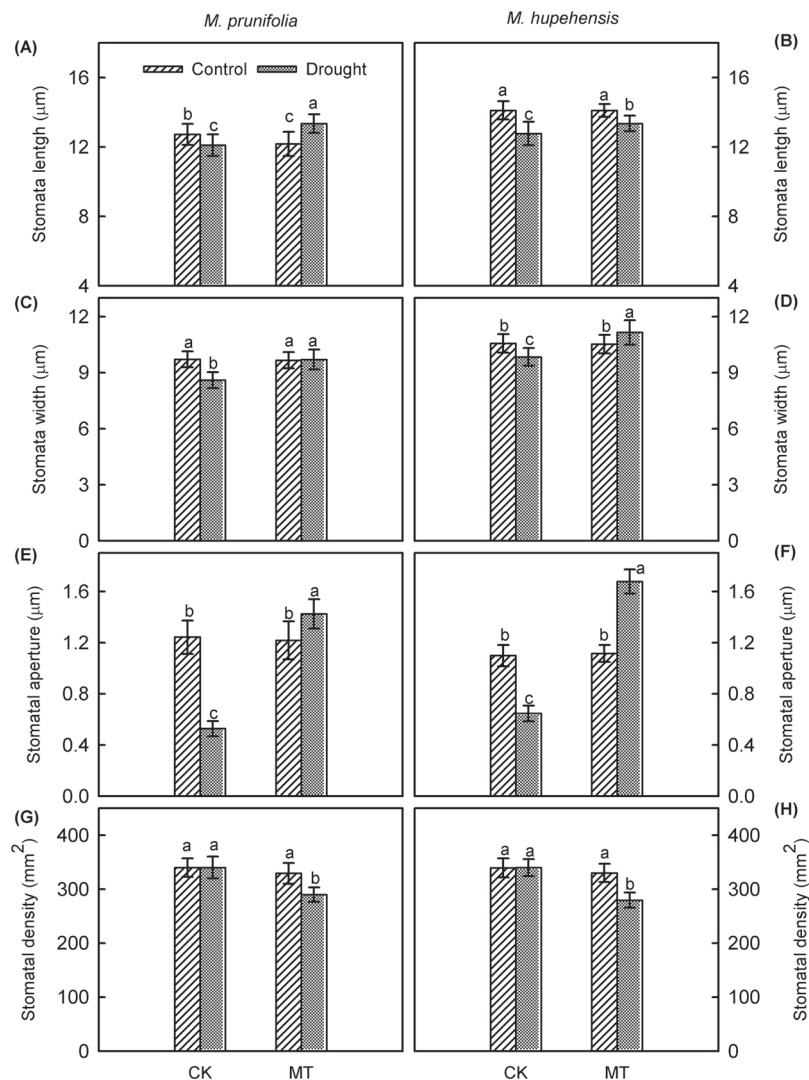

**Fig. 7.** Effects of melatonin on stomatal properties of leaves from *M. prunifolia* and *M. hupehensis* under control and drought conditions: length (A and B), width (C and D), aperture size (E and F), and density (G and H). CK, non-melatonin pre-treated control; MT, plants pre-treated with melatonin. Data are means of 30 images±SD. An ANOVA test followed by Tukey's test was performed. Different letters are used to indicate means that are significantly different ( $P < 0.05$ ).



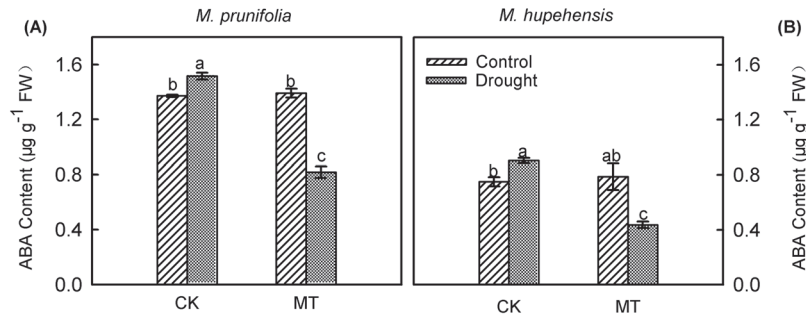

**Fig. 8.** Effects of melatonin on ABA contents in *M. prunifolia* (A) and *M. hupehensis* (B) under control and drought conditions. CK, non-melatonin pre-treated control plants; MT, plants pre-treated with melatonin. Data are means of five replicates $\pm$ SD. An ANOVA test followed by Tukey's test was performed. Different letters are used to indicate means that are significantly different ( $P < 0.05$ ).

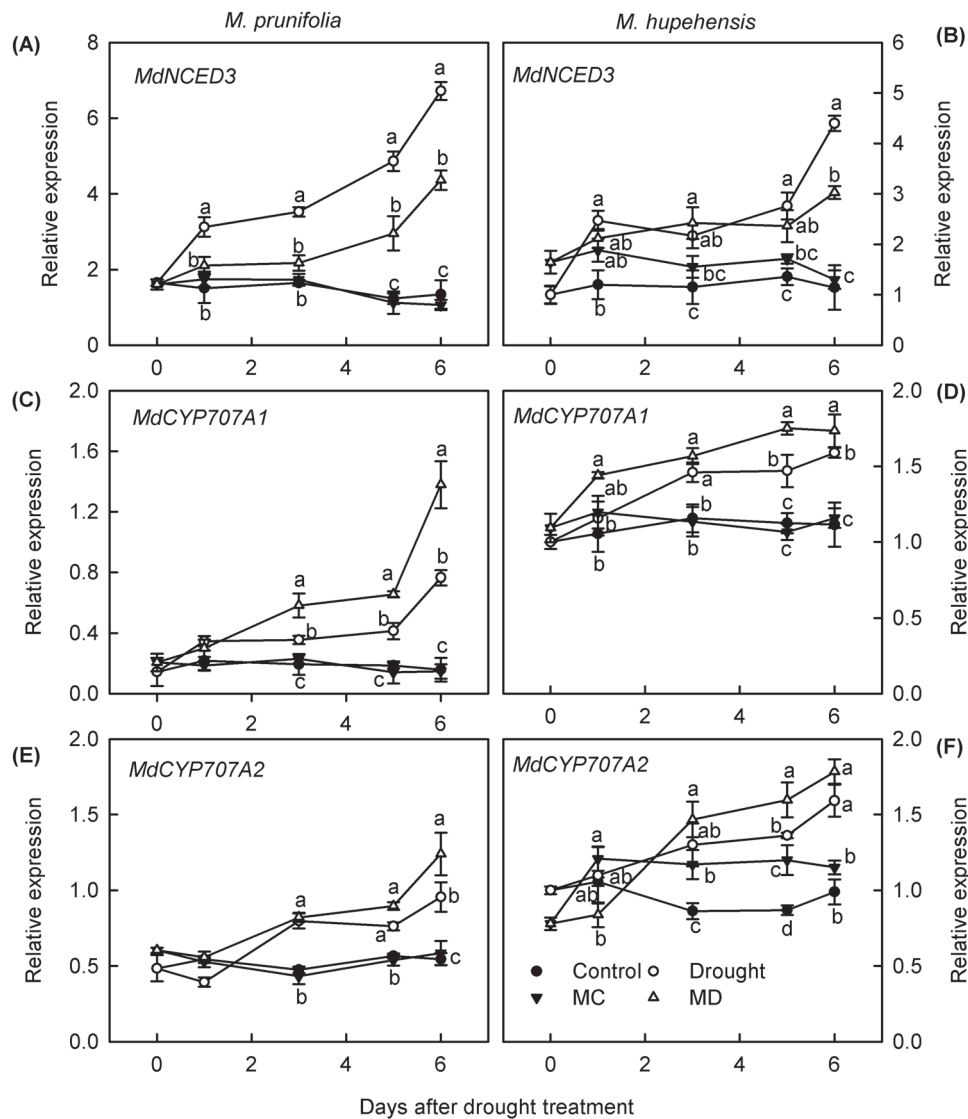

**Fig. 9.** Effects of melatonin on expression of genes in ABA synthesis and metabolic pathway: *MdNCED3* (A and B), *MdCYP707A1* (C and D), and *MdCYP707A2* (E and F) in leaves of *M. prunifolia* and *M. hupehensis*. Total RNA was isolated from samples at different time points, converted to cDNA, and subjected to real-time RT-PCR. Expression levels were calculated relative to expression of *Malus EF-1a* mRNA. Closed and open circles indicate plants without melatonin pre-treatment under control and drought conditions, respectively. Closed and open triangles indicate plants with melatonin pre-treatment under control and drought conditions, respectively. Data are means of five replicates $\pm$ SD. An ANOVA test followed by Tukey's test was performed. Different letters are used to indicate means that are significantly different ( $P < 0.05$ ).

the behaviour of stomatal apertures in response to environmental variables (Chaves *et al.*, 2009). It is considered fundamental in that process because it triggers activity in guard

cell membrane channels and transporters, thereby decreasing guard cell turgor and ultimately closing the stomata (Brodrick and McAdam, 2013). For example, severely stressed *Callitris*

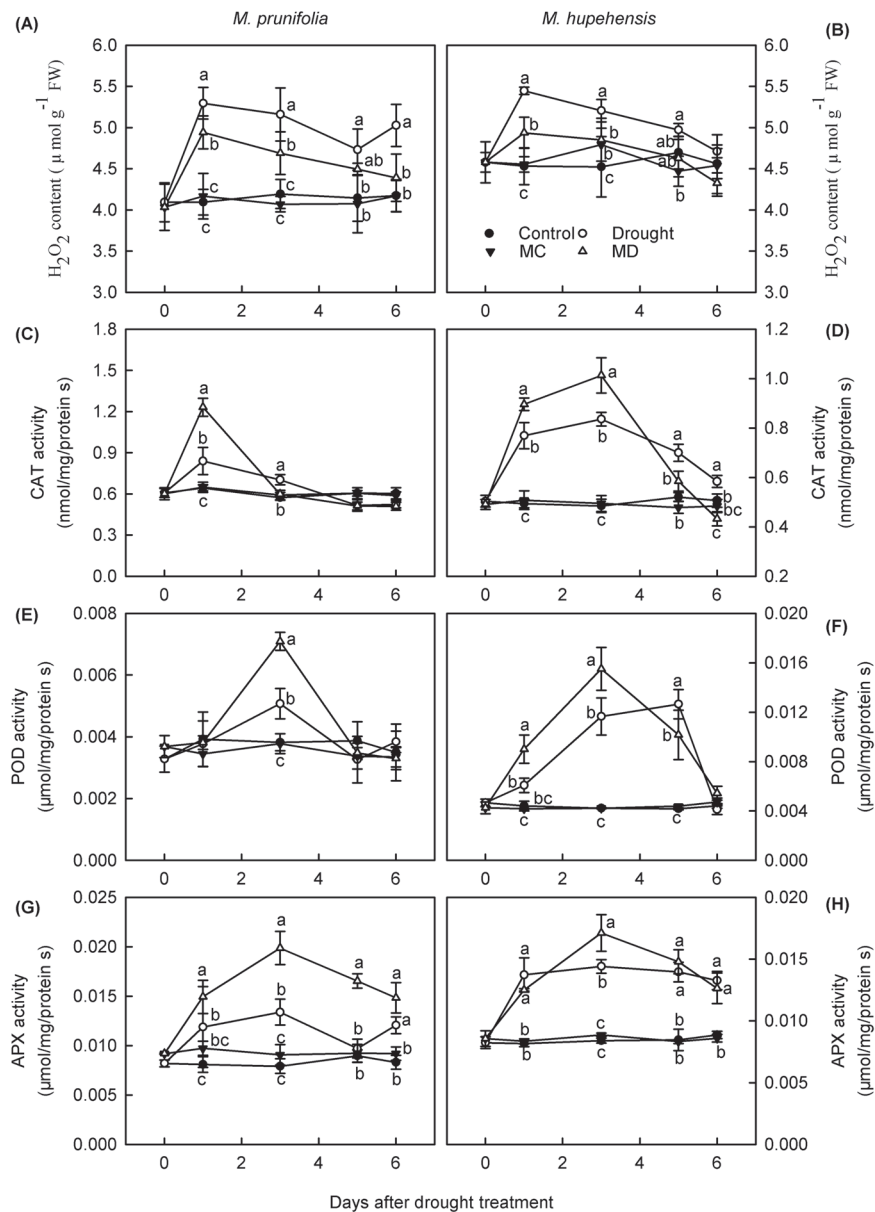

**Fig. 10.** Effects of melatonin on  $\text{H}_2\text{O}_2$  accumulations and activities of antioxidant enzymes in leaves during stress period:  $\text{H}_2\text{O}_2$  content (A and B), CAT activity (C and D), POD activity (E and F), and APX activity (G and H). Closed and open circles indicate plants without melatonin pre-treatment under control and drought conditions, respectively. Closed and open triangles indicate plants with melatonin pre-treatment under control and drought conditions, respectively. Data are means of five replicates  $\pm$  SD. An ANOVA test followed by Tukey's test was performed. Different letters are used to indicate means that are significantly different ( $P < 0.05$ ).

*rhomboidea* plants that have depressed levels of ABA immediately re-open their stomata as soon as the leaves or soil are rehydrated (Brodrigg and McAdam, 2013). The influence that ABA has on stomatal behaviour is related to its ability to increase the synthesis of  $\text{H}_2\text{O}_2$  in guard cells via NADPH oxidase. Thus, elevated levels of  $\text{H}_2\text{O}_2$  mediate ABA-induced stomatal closure.

Based on these observations, it is proposed that melatonin uses two means for increasing drought tolerance, first by enhancing ABA degradation and suppressing its synthesis. Consequently, less  $\text{H}_2\text{O}_2$  is accumulated in the guard cells. Second, melatonin directly scavenges that  $\text{H}_2\text{O}_2$  (Galano et al., 2013; Reiter et al., 2007; Tan et al., 2000, 2007b). It also up-regulates the activities of antioxidant enzymes,

particularly CAT, POD, and APX, which are very efficient in degrading  $\text{H}_2\text{O}_2$  (Li et al., 2012; Park et al., 2013). Therefore, the reduced contents of both ABA and  $\text{H}_2\text{O}_2$  work synergistically and lead to improved performance by stomata, so that they can re-open under drought conditions. This enhancement of stress tolerance is reflected in the diminished leakage of electrolytes, higher water contents in plant tissues, preservation of photosynthetic pigments, and improved functioning of the photosynthesis apparatus.

As expected, pre-treatment with melatonin had a more profound effect on the drought-sensitive species than on the tolerant species. When the expression of genes for melatonin synthesis enzymes was monitored, the resultant data also supported our speculation that melatonin is an important

molecule for regulating drought tolerance. Because this expression was stronger in the more sensitive species, it is believed that its machinery for melatonin synthesis cannot produce sufficient melatonin to guard against this stressor. Therefore, those genes must be further up-regulated so that adequate amounts of enzymes are produced. Future investigations should focus on identifying genetic mutations of that pathway in those two species.

In conclusion, when tolerant and sensitive apple plants are pre-treated with melatonin, they show greater tolerance and adaptability to drought stress. Dual protective mechanisms work synergistically to improve stomatal functioning, which regulates water status under either normal or drought conditions (Jones, 1998; Katul *et al.*, 2003; Sperry *et al.*, 2002). These findings provide evidence for the physiological role of melatonin and serve as a platform for possible applications in agricultural or related fields of research.

## Acknowledgements

This work was supported by the earmarked fund for the China Agriculture Research System (CARS-28). The authors are grateful to Priscilla Licht for help in revising our English composition, to Zhengwei Ma for management of the potted apple plants, to Guoyun Zhang for guidance in operating the SEM system, and to Liqun Qiu for coordinating the determination of ABA contents.

## References

- Afreen F, Zobayed S, Kozai T. 2006. Melatonin in *Glycyrrhiza uralensis*: response of plant roots to spectral quality of light and UV-B radiation. *Journal of Pineal Research* **41**, 108–115.
- Apel K, Hirt H. 2004. Reactive oxygen species: metabolism, oxidative stress, and signal transduction. *Annual Review of Plant Biology* **55**, 373–399.
- Arnao MB, Hernández-Ruiz J. 2006. The physiological function of melatonin in plants. *Plant Signal Behavior* **1**, 89–95.
- Arnao M, Hernández-Ruiz J. 2009. Protective effect of melatonin against chlorophyll degradation during the senescence of barley leaves. *Journal of Pineal Research* **46**, 58–63.
- Arnao MB, Hernández-Ruiz J. 2013. Growth conditions determine different melatonin levels in *Lupinus albus* L. *Journal of Pineal Research* **55**, 149–155.
- Arnao MB, Hernández-Ruiz J. 2014. Melatonin: plant growth regulator and/or biostimulator during stress? *Trends in Plant Science* doi: 10.1016/j.tplants.2014.07.006
- Arnon DI. 1949. Copper enzymes in isolated chloroplasts. Polyphenoloxidase in *Beta vulgaris*. *Plant Physiology* **24**, 1.
- Bethke PC, Jones RL. 2001. Cell death of barley aleurone protoplasts is mediated by reactive oxygen species. *The Plant Journal* **25**, 19–29.
- Brodribb TJ, McAdam SA. 2013. Abscisic acid mediates a divergence in the drought response of two conifers. *Plant Physiology* **162**, 1370–1377.
- Chance B, Maehly A. 1955. Assay of catalases and peroxidases. *Methods in Enzymology* **2**, 764–775.
- Chang S, Puryear J, Cairney J. 1993. A simple and efficient method for isolating RNA from pine trees. *Plant Molecular Biology Reporter* **11**, 113–116.
- Chaves MM, Maroco JP, Pereira JS. 2003. Understanding plant responses to drought—from genes to the whole plant. *Functional Plant Biology* **30**, 239–264.
- Chaves M, Flexas J, Pinheiro C. 2009. Photosynthesis under drought and salt stress: regulation mechanisms from whole plant to cell. *Annals of Botany* **103**, 551–560.
- Dehesh K, Savchenko T, Kolla V, Wang CQ, Nasafi Z, Hicks D, Phadungchob B, Chehab W, Brandizzi F, Froehlich J. 2014. Functional convergence of oxylipin and ABA pathways controls stomatal closure in response to drought. *Plant Physiology* **164**, 1151–1160.
- Dionisio-Sese ML, Tobita S. 1998. Antioxidant responses of rice seedlings to salinity stress. *Plant Science* **135**, 1–9.
- Farooq M, Hussain M, Wahid A, Siddique HMK. 2012. Drought stress in plants: An overview. In: Aroca R, ed. *Plant responses to drought stress*. Heidelberg: Springer, 1–33.
- Foyer CH, Noctor G. 2005. Oxidant and antioxidant signalling in plants: a re-evaluation of the concept of oxidative stress in a physiological context. *Plant, Cell and Environment* **28**, 1056–1071.
- Fujita Y, Fujita M, Satoh R *et al.* 2005. AREB1 is a transcription activator of novel ABRE-dependent ABA signaling that enhances drought stress tolerance in *Arabidopsis*. *The Plant Cell Online* **17**, 3470–3488.
- Galano A, Tan DX, Reiter RJ. 2013. On the free radical scavenging activities of melatonin's metabolites, AFMK and AMK. *Journal of Pineal Research* **54**, 245–257.
- Gaxiola RA, Li J, Undurraga S, Dang LM, Allen GJ, Alper SL, Fink GR. 2001. Drought- and salt-tolerant plants result from overexpression of the AVP1 H<sup>+</sup>-pump. *Proceedings of the National Academy of Sciences, USA* **98**, 11444–11449.
- Ippolito M, Fasciano C, d'Aquino L, Tommasi F. 2011. Responses of antioxidant systems to lanthanum nitrate treatments in tomato plants during drought stress. *Plant Biosystems* **145**, 248–252.
- Iuchi S, Kobayashi M, Taji T, Naramoto M, Seki M, Kato T, Tabata S, Kakubari Y, Yamaguchi-Shinozaki K, Shinozaki K. 2001. Regulation of drought tolerance by gene manipulation of 9-*cis*-epoxycarotenoid dioxygenase, a key enzyme in abscisic acid biosynthesis in *Arabidopsis*. *The Plant Journal* **27**, 325–333.
- Jiang M, Zhang J. 2002. Water stress-induced abscisic acid accumulation triggers the increased generation of reactive oxygen species and up-regulates the activities of antioxidant enzymes in maize leaves. *Journal of Experimental Botany* **53**, 2401–2410.
- Jones HG. 1998. Stomatal control of photosynthesis and transpiration. *Journal of Experimental Botany* **49**, 387–398.
- Kang K, Lee K, Park S, Kim YS, Back K. 2010. Enhanced production of melatonin by ectopic overexpression of human serotonin *N*-acetyltransferase plays a role in cold resistance in transgenic rice seedlings. *Journal of Pineal Research* **49**, 176–182.
- Kang K, Kong K, Park S, Natsagdorj U, Kim YS, Back K. 2011. Molecular cloning of a plant *N*-acetylserotonin methyltransferase and its expression characteristics in rice. *Journal of Pineal Research* **50**, 304–309.
- Kang S, Kang K, Lee K, Back K. 2007a. Characterization of rice tryptophan decarboxylases and their direct involvement in serotonin biosynthesis in transgenic rice. *Planta* **227**, 263–272.
- Kang S, Kang K, Lee K, Back K. 2007b. Characterization of tryptamine 5-hydroxylase and serotonin synthesis in rice plants. *Plant Cell Reports* **26**, 2009–2015.
- Katul G, Leuning R, Oren R. 2003. Relationship between plant hydraulic and biochemical properties derived from a steady-state coupled water and carbon transport model. *Plant, Cell and Environment* **26**, 339–350.
- Kolář J, Macháčková I, Eder J, Prinsen E, Van Dongen W, Van Onckelen H, Illnerová H. 1997. Melatonin: occurrence and daily rhythm in *Chenopodium rubrum*. *Phytochemistry* **44**, 1407–1413.
- Kondo S, Sugaya S, Sugawa S, Ninomiya M, Kittikorn M, Okawa K, Ohara H, Ueno K, Todoroki Y, Mizutani M. 2012. Dehydration tolerance in apple seedlings is affected by an inhibitor of ABA 8'-hydroxylase CYP707A. *Journal of Plant Physiology* **169**, 234–241.
- Kushiro T, Okamoto M, Nakabayashi K, Yamagishi K, Kitamura S, Asami T, Hirai N, Koshihara T, Kamiya Y, Nambara E. 2004. The *Arabidopsis* cytochrome P450 CYP707A encodes ABA 8'-hydroxylases: key enzymes in ABA catabolism. *The EMBO Journal* **23**, 1647–1656.
- Lei Q, Wang L, Tan DX, Zhao Y, Zheng XD, Chen H, Li Qt, Zuo Bx, Kong J. 2013. Identification of genes for melatonin synthetic enzymes in 'Red Fuji' apple (*Malus domestica* Borkh. cv. Red) and their expression and melatonin production during fruit development. *Journal of Pineal Research* **55**, 443–451.
- Lei XY, Zhu RY, Zhang GY, Dai YR. 2004. Attenuation of cold-induced apoptosis by exogenous melatonin in carrot suspension cells: the possible involvement of polyamines. *Journal of Pineal Research* **36**, 126–131.
- Li C, Wang P, Wei ZW, Liang D, Liu CH, Yin L, Jia DF, Fu MY, Ma FW. 2012. The mitigation effects of exogenous melatonin on salinity-induced stress in *Malus hupehensis*. *Journal of Pineal Research* **53**, 298–306.

- Li Y, Zhao H, Duan B, Korpelainen H, Li C.** 2011. Effect of drought and ABA on growth, photosynthesis and antioxidant system of *Cotinus coggygia* seedlings under two different light conditions. *Environmental and Experimental Botany* **71**, 107–113.
- Liu Y, Ye N, Liu R, Chen M, Zhang J.** 2010. H<sub>2</sub>O<sub>2</sub> mediates the regulation of ABA catabolism and GA biosynthesis in *Arabidopsis* seed dormancy and germination. *Journal of Experimental Botany* **61**, 2979–2990.
- Nakano Y, Asada K.** 1981. Hydrogen peroxide is scavenged by ascorbate-specific peroxidase in spinach chloroplasts. *Plant and Cell Physiology* **22**, 867–880.
- Nambara E, Marion-Poll A.** 2005. Abscisic acid biosynthesis and catabolism. *Annual Review of Plant Biology* **56**, 165–185.
- Neill S, Desikan R, Hancock J.** 2002. Hydrogen peroxide signalling. *Current Opinion in Plant Biology* **5**, 388–395.
- Okazaki M, Higuchi K, Hanawa Y, Shiraiwa Y, Ezura H.** 2009. Cloning and characterization of a *Chlamydomonas reinhardtii* cDNA arylalkylamine *N*-acetyltransferase and its use in the genetic engineering of melatonin content in the Micro-Tom tomato. *Journal of Pineal Research* **46**, 373–382.
- Okazaki M, Higuchi K, Aouini A, Ezura H.** 2010. Lowering intercellular melatonin levels by transgenic analysis of indoleamine 2, 3-dioxygenase from rice in tomato plants. *Journal of Pineal Research* **49**, 239–247.
- Park S, Back K.** 2012. Melatonin promotes seminal root elongation and root growth in transgenic rice after germination. *Journal of Pineal Research* **53**, 385–389.
- Park S, Lee K, Kim YS, Back K.** 2012. Tryptamine 5-hydroxylase-deficient Sekiguchi rice induces synthesis of 5-hydroxytryptophan and *N*-acetyltryptamine but decreases melatonin biosynthesis during senescence process of detached leaves. *Journal of Pineal Research* **52**, 211–216.
- Park S, Lee DE, Jang H, Byeon Y, Kim YS, Back K.** 2013. Melatonin-rich transgenic rice plants exhibit resistance to herbicide-induced oxidative stress. *Journal of Pineal Research* **54**, 258–263.
- Patterson BD, MacRae EA, Ferguson IB.** 1984. Estimation of hydrogen peroxide in plant extracts using titanium (IV). *Analytical Biochemistry* **139**, 487–492.
- Pei ZM, Murata Y, Benning G, Thomine S, Klüsener B, Allen GJ, Grill E, Schroeder JI.** 2000. Calcium channels activated by hydrogen peroxide mediate abscisic acid signalling in guard cells. *Nature* **406**, 731–734.
- Pelagio-Flores R, Muñoz-Parra E, Ortiz-Castro R, López-Bucio J.** 2012. Melatonin regulates *Arabidopsis* root system architecture likely acting independently of auxin signaling. *Journal of Pineal Research* **53**, 279–288.
- Posmyk MM, Kuran H, Marciniak K, Janas KM.** 2008. Presowing seed treatment with melatonin protects red cabbage seedlings against toxic copper ion concentrations. *Journal of Pineal Research* **45**, 24–31.
- Qin X, Zeevaart JA.** 1999. The 9-*cis*-epoxycarotenoid cleavage reaction is the key regulatory step of abscisic acid biosynthesis in water-stressed bean. *Proceedings of the National Academy of Sciences, USA* **96**, 15354–15361.
- Reiter RJ, Tan DX, Terron MP, Flores LJ, Czarnocki Z.** 2007. Melatonin and its metabolites: new findings regarding their production and their radical scavenging actions. *Acta Biochemica Polonica* **54**, 1–9.
- Saito S, Hirai N, Matsumoto C, Ohigashi H, Ohta D, Sakata K, Mizutani M.** 2004. *Arabidopsis* CYP707As encode (+)-abscisic acid 8'-hydroxylase, a key enzyme in the oxidative catabolism of abscisic acid. *Plant Physiology* **134**, 1439–1449.
- Schroeder JI, Allen GJ, Hugouvieux V, Kwak JM, Waner D.** 2001. Guard cell signal transduction. *Annual Review of Plant Biology* **52**, 627–658.
- Seki M, Umezawa T, Urano K, Shinozaki K.** 2007. Regulatory metabolic networks in drought stress responses. *Current Opinion in Plant Biology* **10**, 296–302.
- Shi H, Chan Z.** 2014. The cysteine2/histidine2-type transcription factor ZINC FINGER OF ARABIDOPSIS THALIANA 6-activated C-REPEAT-BINDING FACTOR pathway is essential for melatonin-mediated freezing stress resistance in *Arabidopsis*. *Journal of Pineal Research* **57**, 185–191.
- Sperry J, Hacke U, Oren R, Comstock J.** 2002. Water deficits and hydraulic limits to leaf water supply. *Plant, Cell and Environment* **25**, 251–263.
- Tal O, Haim A, Harel O, Gerchman Y.** 2011. Melatonin as an antioxidant and its semi-lunar rhythm in green macroalga *Ulva* sp. *Journal of Experimental Botany* **62**, 1903–1910.
- Tan DX, Manchester LC, Reiter RJ, Plummer BF, Limson J, Weintraub ST, Qi W.** 2000. Melatonin directly scavenges hydrogen peroxide: a potentially new metabolic pathway of melatonin biotransformation. *Free Radical Biology and Medicine* **29**, 1177–1185.
- Tan DX, Manchester LC, Helton P, Reiter RJ.** 2007a. Phytoremediative capacity of plants enriched with melatonin. *Plant Signal Behavior* **2**, 514–516.
- Tan DX, Manchester LC, Terron MP, Flores LJ, Reiter RJ.** 2007b. One molecule, many derivatives: A never-ending interaction of melatonin with reactive oxygen and nitrogen species? *Journal of Pineal Research* **42**, 28–42.
- Tan DX, Hardeland R, Manchester LC, Korkmaz A, Ma S, Rosales-Corral S, Reiter RJ.** 2012. Functional roles of melatonin in plants, and perspectives in nutritional and agricultural science. *Journal of Experimental Botany* **63**, 577–597.
- Tiryaki I, Keles H.** 2012. Reversal of the inhibitory effect of light and high temperature on germination of *Phacelia tanacetifolia* seeds by melatonin. *Journal of Pineal Research* **52**, 332–339.
- Wang P, Sun X, Chang C, Feng FJ, Liang D, Cheng LL, Ma FW.** 2013a. Delay in leaf senescence of *Malus hupehensis* by long-term melatonin application is associated with its regulation of metabolic status and protein degradation. *Journal of Pineal Research* **55**, 424–434.
- Wang P, Sun X, Li C, Wei ZW, Liang D, Ma FW.** 2013b. Long-term exogenous application of melatonin delays drought-induced leaf senescence in apple. *Journal of Pineal Research* **54**, 292–302.
- Wang P, Sun X, Xie YP, Li MJ, Chen W, Zhang S, Liang D, Ma FW.** 2014. Melatonin regulates proteomic changes during leaf senescence in *Malus hupehensis*. *Journal of Pineal Research* **57**, 291–307.
- Wang SC, Wang RC, Liang D, Ma FW, Shu HR.** 2012. Molecular characterization and expression analysis of a glycine-rich RNA-binding protein gene from *Malus hupehensis* Rehd. *Molecular Biology Reports* **39**, 4145–4153.
- Xia XJ, Gao CJ, Song LX, Zhou YH, Shi K, Yu JQ.** 2014. Role of H<sub>2</sub>O<sub>2</sub> dynamics in brassinosteroid-induced stomatal closure and opening in *Solanum lycopersicum*. *Plant, Cell and Environment* doi: 10.1111/pce.12275
- Xu X.** 2010. Effects of exogenous melatonin on physiological response of cucumber seedlings under high temperature stress. Master's degree thesis, Northwest A and F University.
- Ye N, Zhu G, Liu Y, Li Y, Zhang J.** 2011. ABA controls H<sub>2</sub>O<sub>2</sub> accumulation through the induction of OsCATB in rice leaves under water stress. *Plant and Cell Physiology* **52**, 689–698.
- Yin L, Wang P, Li M, Ke X, Li C, Liang D, Wu S, Ma X, Li C, Zou Y.** 2013. Exogenous melatonin improves *Malus* resistance to Marssonina apple blotch. *Journal of Pineal Research* **54**, 426–434.
- Zhang HJ, Zhang N, Yang RC, Wang L, Sun QQ, Li DB, Cao YY, Weeda S, Zhao B, Ren S, Guo YD.** 2014. Melatonin promotes seed germination under high salinity by regulating antioxidant systems, ABA and GA4 interaction in cucumber (*Cucumis sativus* L.). *Journal of Pineal Research* **57**, 269–279.
- Zhang N, Zhao B, Zhang HJ, Weeda S, Yang C, Yang ZC, Ren S, Guo YD.** 2013. Melatonin promotes water-stress tolerance, lateral root formation, and seed germination in cucumber (*Cucumis sativus* L.). *Journal of Pineal Research* **54**, 15–23.
- Zhang X, Zhang L, Dong F, Gao J, Galbraith DW, Song CP.** 2001. Hydrogen peroxide is involved in abscisic acid-induced stomatal closure in *Vicia faba*. *Plant Physiology* **126**, 1438–1448.
- Zhang XZ, Zhao YB, Wang GP, Chang RF, Li CM, Shu HR.** 2008. Dynamics of endogenous cytokinins during phase change in *Malus domestica* Borkh. *Acta Horticulturae* **774**, 29–33.
- Zhu JK.** 2002. Salt and drought stress signal transduction in plants. *Annual Review of Plant Biology* **53**, 247–273.
